# Supplementary material for: Room temperature ferroelectricity and blue photoluminescence in zero dimensional organic lead iodine perovskites
Source: Royal Society of Chemistry journal article supplement (doi:10.1039/d0tc04813e), 2020-11-19
Supplement: d0tc04813e1.pdf [file d0tc04813e1.pdf]

## Supplementary information

### Room temperature ferroelectricity and blue photoluminescence in zero dimensional organic lead iodine perovskites

Yiming Wang<sup>a</sup>, Zheng Tang<sup>a</sup>, Chunlin Liu<sup>b</sup>, Junjie Jiang<sup>a</sup>, Wenlong Liu<sup>b</sup>, binbin zhang<sup>c</sup>, Kaige Gao<sup>b\*</sup>, Honglin Cai<sup>a</sup> Xiaoshan Wu<sup>a</sup>

**Table S1.** Xprep information of the DMAPbI<sub>3</sub> single crystal XRD data measured at room temperature.

| Option | Space Group | No. | Type    | Axes | CSD | R(sym) | N(eq) | Syst. Abs. | CFOM |
|--------|-------------|-----|---------|------|-----|--------|-------|------------|------|
| [A]    | <i>Cmca</i> | #64 | centro  | 2    | 113 | 0.060  | 4617  | 0.9 / 5.2  | 4.79 |
| [B]    | <i>Aba2</i> | #41 | non-cen | 5    | 69  | 0.060  | 4617  | 0.9 / 5.2  | 4.89 |

**Table S2** Crystallographic data

|                                                                             |                                                                |
|-----------------------------------------------------------------------------|----------------------------------------------------------------|
| Temperature                                                                 | 293 K                                                          |
| Formula                                                                     | C <sub>8</sub> N <sub>4</sub> H <sub>32</sub> PbI <sub>6</sub> |
| Formula weight                                                              | 1152.71                                                        |
| Crystal system                                                              | Orthorhombic                                                   |
| Space group                                                                 | <i>Aba2</i>                                                    |
| <i>a</i> / Å                                                                | 11.5704(9)                                                     |
| <i>b</i> / Å                                                                | 15.1216(14)                                                    |
| <i>c</i> / Å                                                                | 16.3060(14)                                                    |
| $\alpha$ / °                                                                | 90                                                             |
| $\beta$ / °                                                                 | 90                                                             |
| $\gamma$ / °                                                                | 90                                                             |
| <i>V</i> / Å <sup>3</sup>                                                   | 2852.9(4)                                                      |
| <i>Z</i>                                                                    | 4                                                              |
| <i>D<sub>c</sub></i> / g·cm <sup>-3</sup>                                   | 2.684                                                          |
| <i>F</i> (000)                                                              | 1904                                                           |
| GOF on <i>F</i> <sup>2</sup>                                                | 1.043                                                          |
| <i>R</i> <sub>1</sub> , <i>wR</i> <sub>2</sub> [ <i>I</i> > 2σ( <i>I</i> )] | 0.0486, 0.1022                                                 |
| <i>R</i> <sub>1</sub> , <i>wR</i> <sub>2</sub> (all data)                   | 0.0870, 0.1158                                                 |
| Flack parameter                                                             | 0.44(4)                                                        |
| CCDC                                                                        | 2016638                                                        |

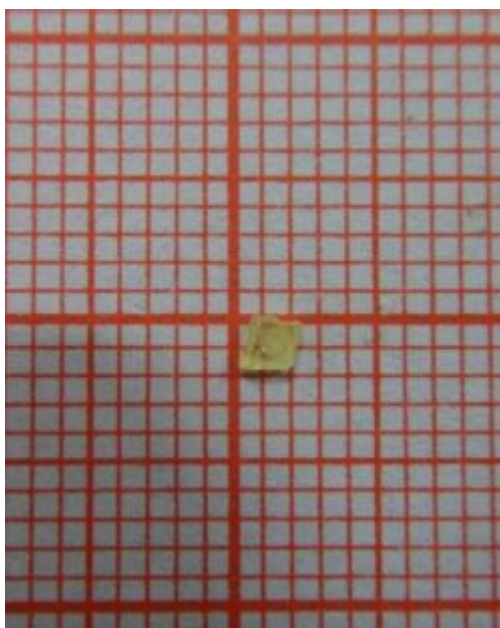

Fig. S1 Digital photo of the grown single crystal of OD (DMA)<sub>4</sub>PbI<sub>6</sub>.

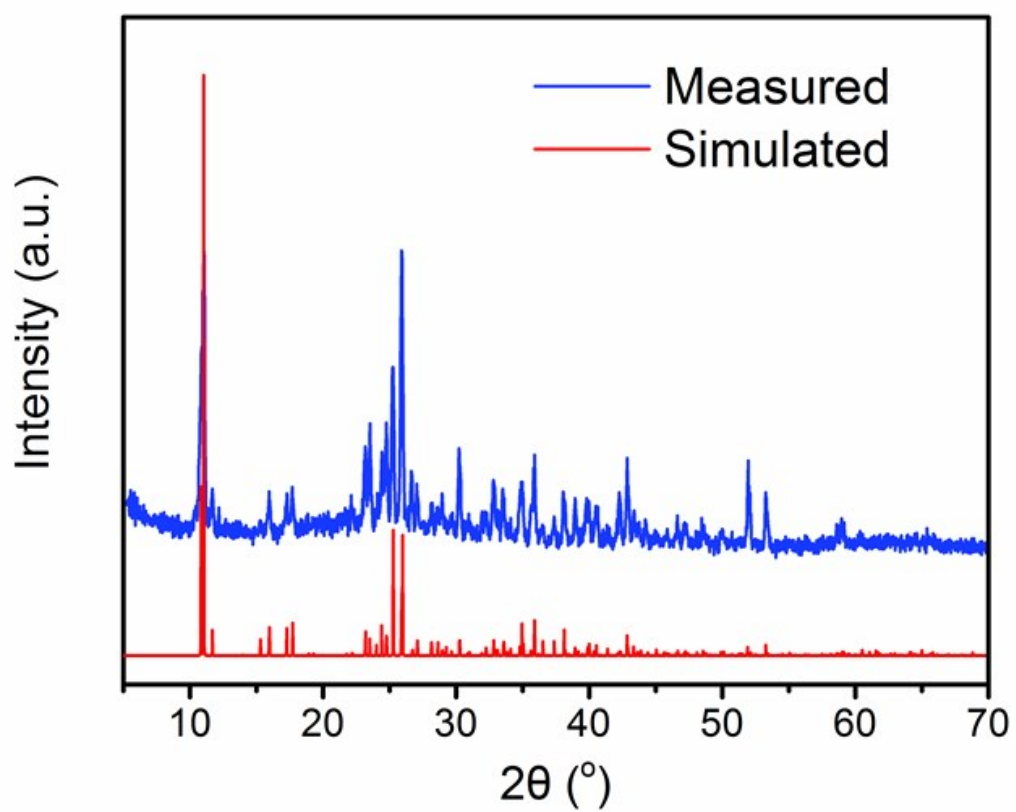

Fig. S2 Powder X-ray diffraction pattern of OD DMA<sub>4</sub>PbI<sub>6</sub> powder and its single crystal X-ray diffraction simulate result

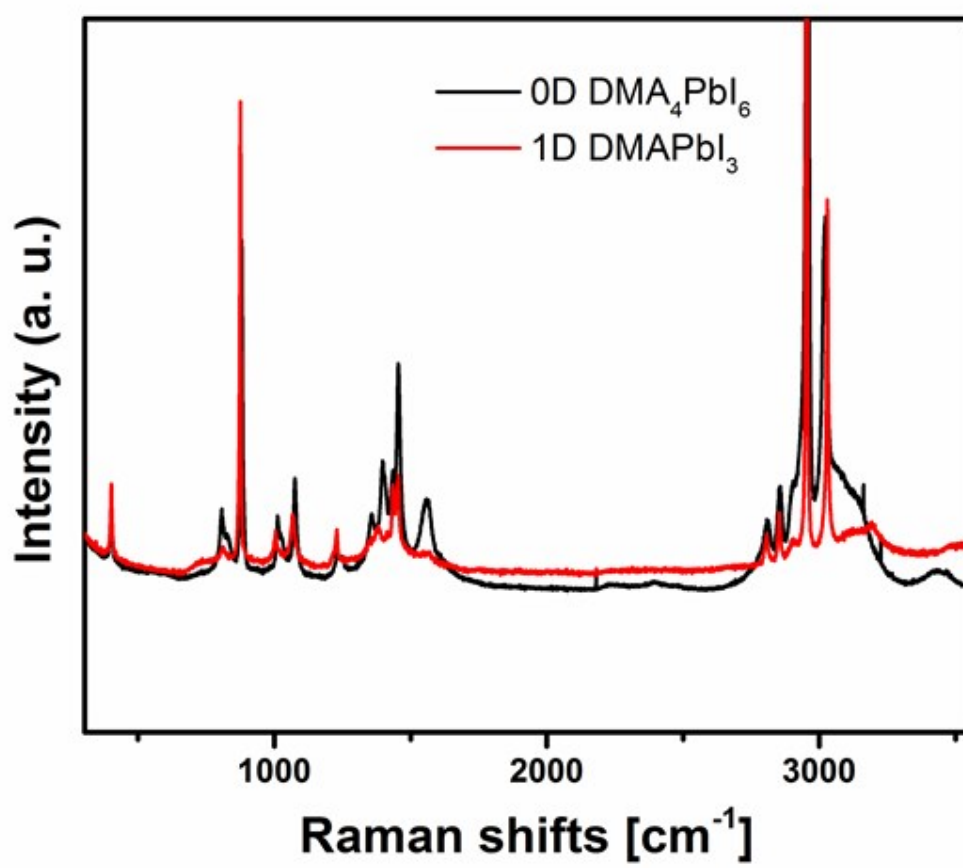

Fig. S3 Raman spectra of (DMA)<sub>4</sub>PbI<sub>6</sub> measured at room temperature compared with 1D DMAPbI<sub>3</sub>.

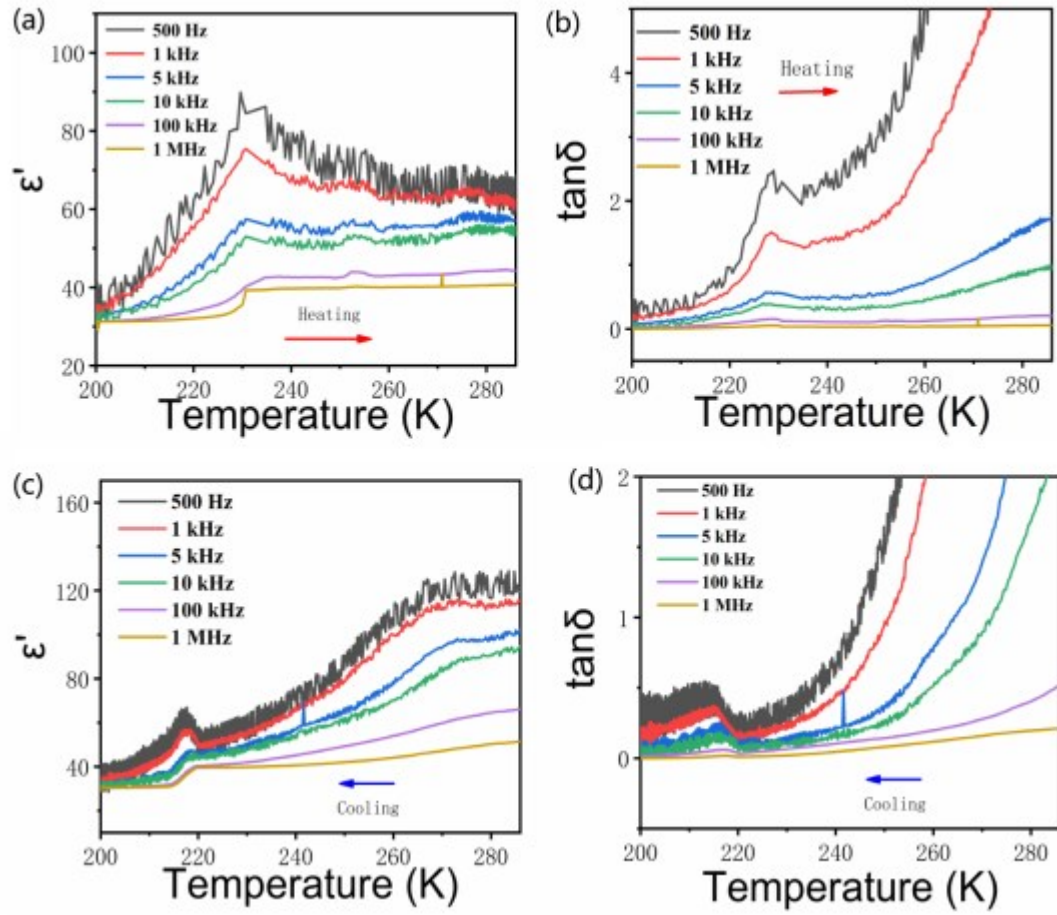

Fig. S4 Temperature dependent dielectric constant and dielectric loss of single crystal  $(\text{DMA})_4\text{PbI}_6$  in the heating process and cooling process. (a) Dielectric constant in the heating process, (b) dielectric loss in the heating process, (c) Dielectric constant in the cooling process, (d) dielectric loss in the cooling process.

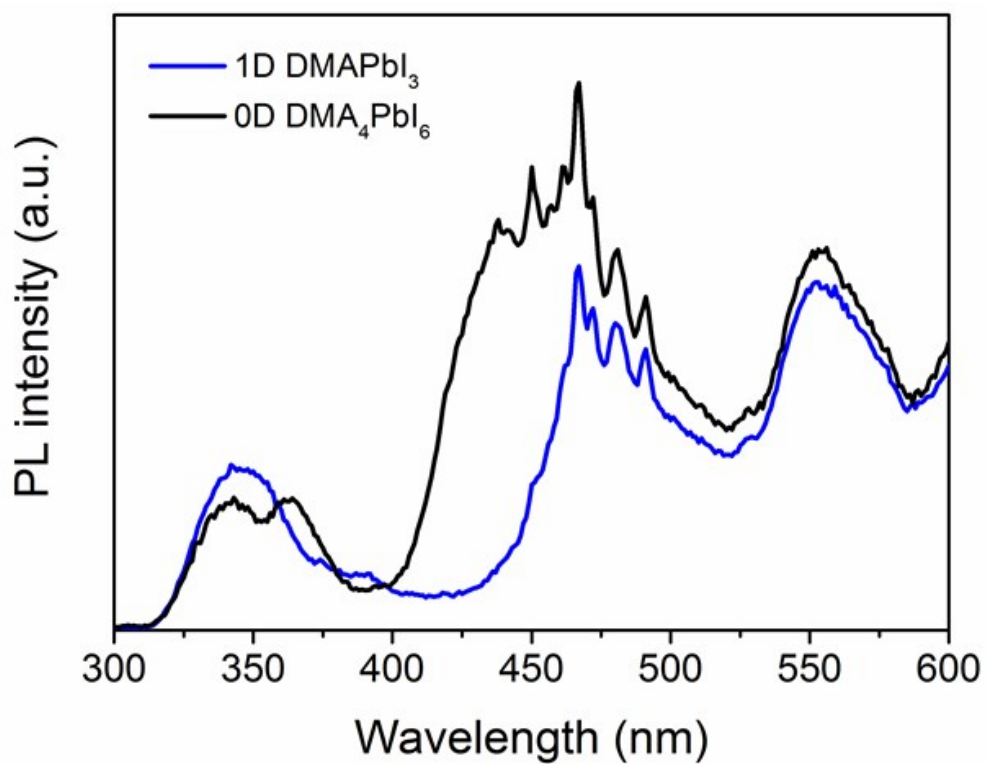

Fig. S5 Photoluminescence of 0D (DMA)<sub>4</sub>PbI<sub>6</sub> and 1D DMAPbI<sub>3</sub> excited by 200 nm UV light.

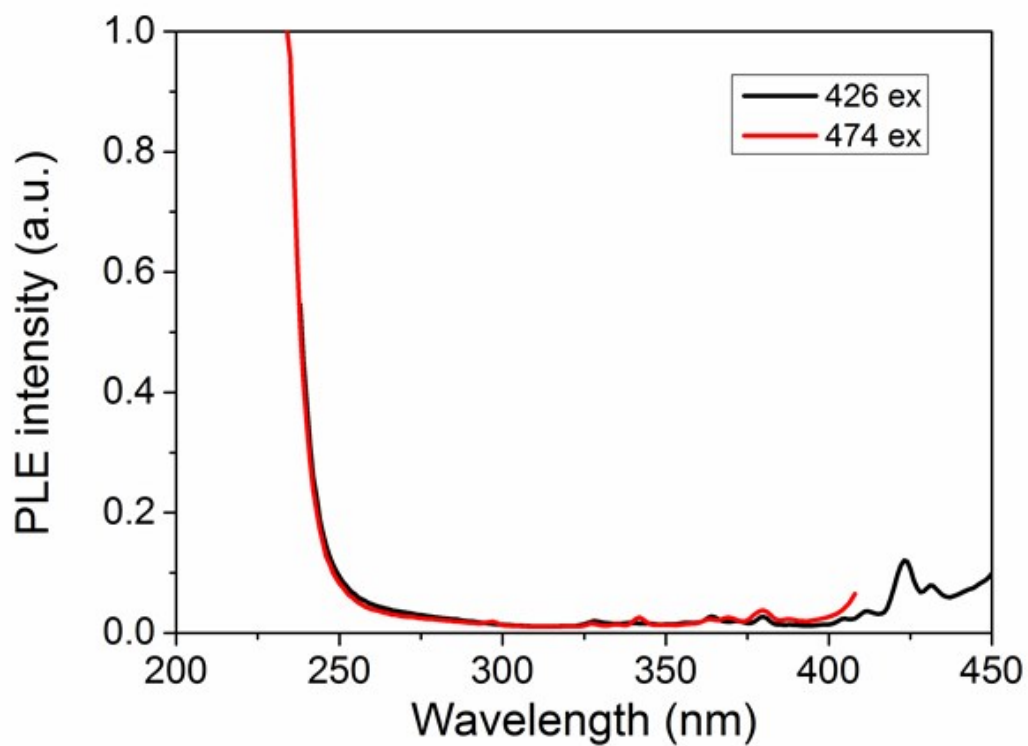

Fig. S6 Photoluminescence excitation spectra of blue 426 nm emission (black line) and blue 474 nm emission (red line) from the powder of 0D (DMA)<sub>4</sub>PbI<sub>6</sub>.

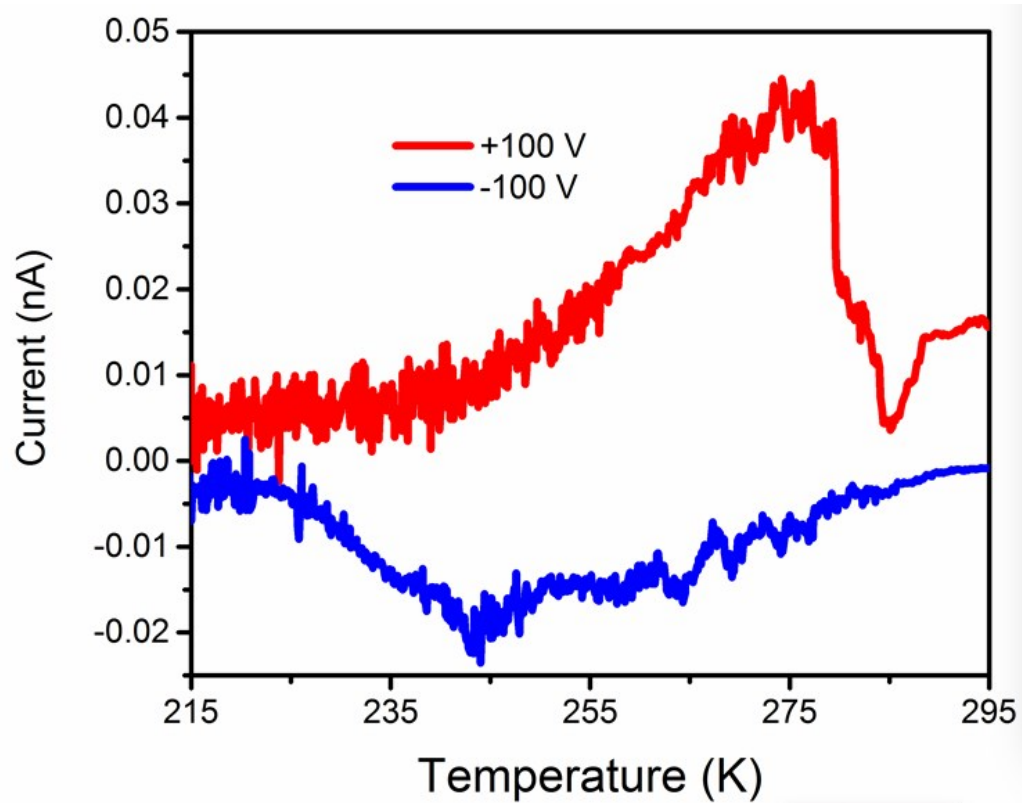

Fig. S7 Pyroelectric current measured on OD (DMA)<sub>4</sub>PbI<sub>6</sub> single crystal.

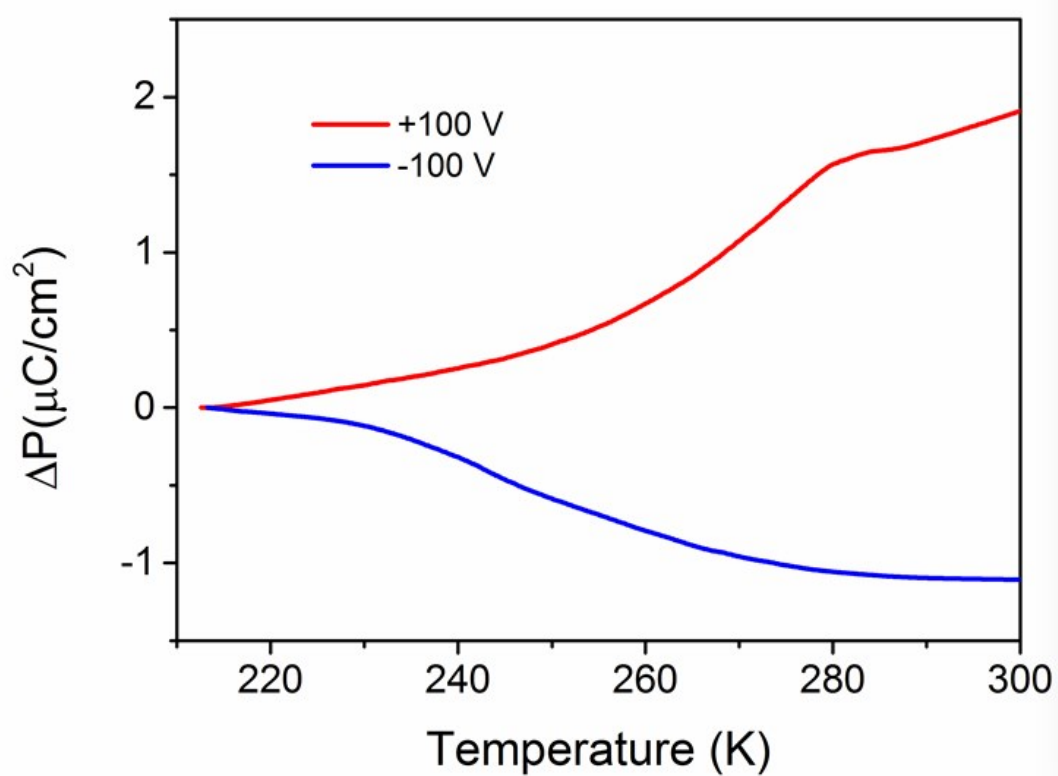

Fig. S8 Polarization change acquired from the pyroelectric current.

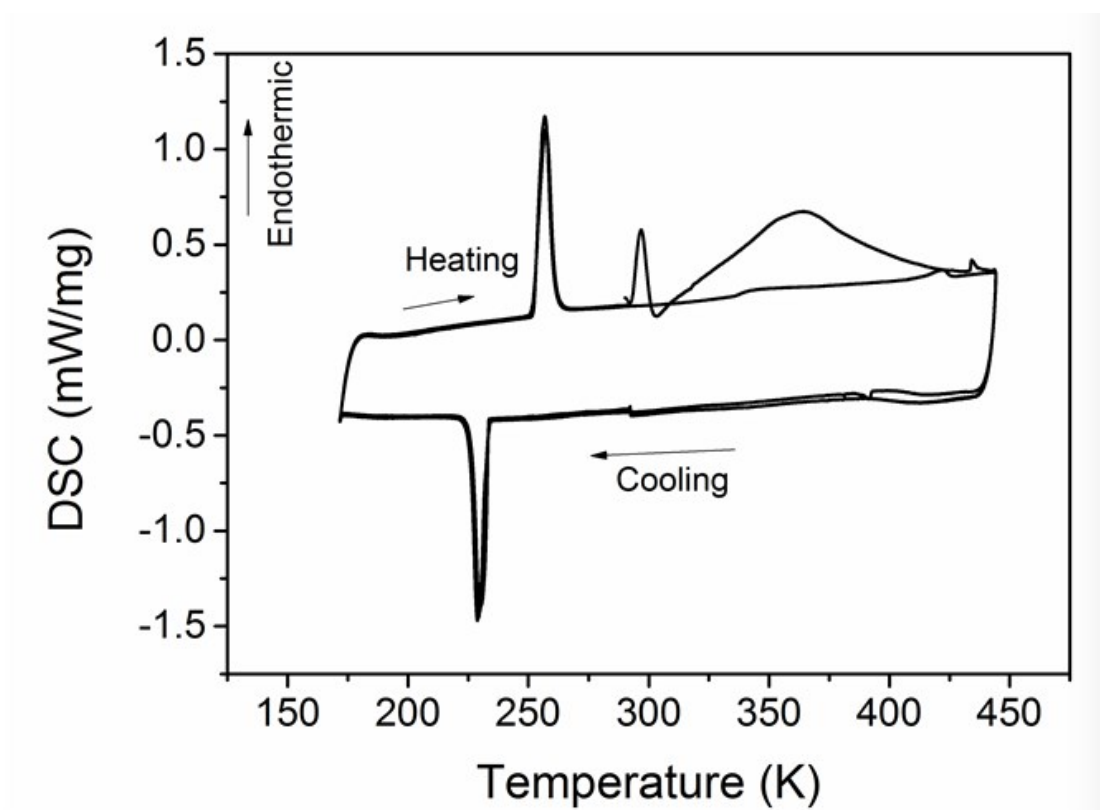

Fig. S9 DSC of OD (DMA)<sub>4</sub>PbI<sub>6</sub> measured with 10 K/min.

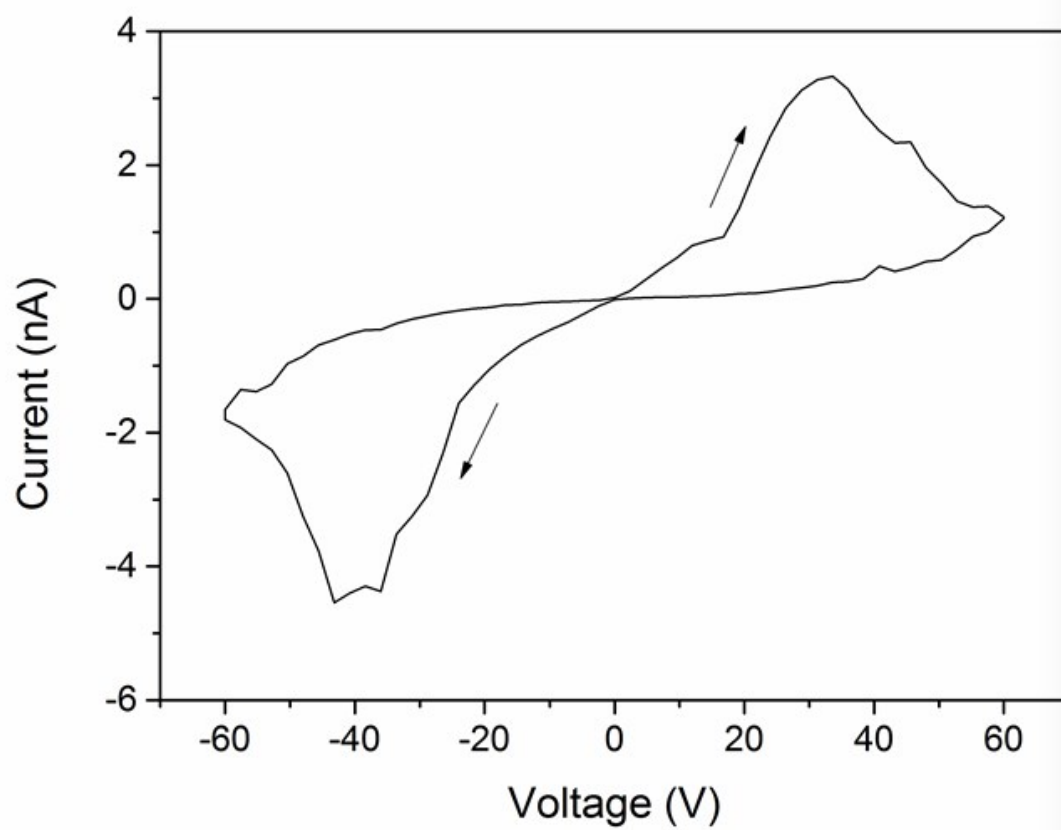

Fig. S10 The IV characteristic curve of OD DMA<sub>4</sub>PbI<sub>6</sub>.
